# Supplementary material
Source: PubMed Central journal article supplement (PMC5286932)
Supplement: 2016_149120-Disclosures_and_Contributions.pdf [file 2016_149120-Disclosures_and_Contributions.pdf]

Haematologica  
HAEMATOL/2016/149120  
Version 4

Guidelines for diagnosis, prevention and management of central nervous system involvement in diffuse large B-cell lymphoma patients by the Spanish Lymphoma Group (GELTAMO)

Francisco-Javier Peñalver, Juan-Manuel Sancho, Adolfo de la Fuente, Maria-Teresa Olave, Alejandro Martin, Carlos Panizo, Elena Pérez, Antonio Salar, and Alberto Orfao

Disclosures: FJP has received honoraria as speaker from Roche and Mundipharma. JMS has received honoraria for participating in advisory boards from Roche, Gilead, Janssen and Spectrum. AdIF has received honoraria as member of speaker's bureau from Roche, Gilead, Janssen, TEVA, Mundipharma and Pfizer. MTO has received honoraria as speaker from Novartis, Gilead, Janssen y Mundipharma. AS has received honoraria as member of speaker's bureau from Roche, Celgene and Mundipharma. AM has received honoraria for participating in advisory boards from Celgene, Servier and Gilead. CP has received honoraria as member of speaker's bureau from Roche, Janssen and Mundipharma. EP has received honoraria as member of speaker's bureau from Roche, Janssen, Spectrum, and Mundipharma. AO has received honoraria as member of speaker's bureau and research support by Mundipharma. Institution (University of Salamanca) receives royalties from ImmunoSTEP SL (Salamanca, Spain) No other potential conflict of interest relevant to this paper was reported.

Contributions: All authors participated in the conception and design of the work. FJP has coordinated the work and revised the final manuscript. FJP, AdIF, MTO, AO, JMS and AS wrote the first draft and revised their chapters, and the rest of the authors have revised the whole manuscript. All authors contributed equally to the consensus meeting. All authors contributed to the editing and finalization of the manuscript. All authors approved the final version of the manuscript.
